# Supplementary material for: Antibacterial activity of Mn(i) and Re(i) tricarbonyl complexes conjugated to a bile acid carrier molecule
Source: Royal Society of Chemistry journal article supplement (doi:10.1039/d0mt00142b), 2020-08-20
Supplement: d0mt00142b1.pdf [file d0mt00142b1.pdf]

**Antibacterial activity of Mn(I) and Re(I) tricarbonyl complexes conjugated  
to a bile acid carrier molecule**

Jono W. Betts,<sup>a</sup> Patrick Roth,<sup>b</sup> Calum A. Pattrick,<sup>c</sup> Hannah M. Southam,<sup>c</sup>  
Roberto M. La Ragione,<sup>a</sup> Robert K. Poole,<sup>c</sup> and Ulrich Schatzschneider<sup>b\*</sup>

<sup>a</sup> *Department of Pathology and Infectious Diseases, School of Veterinary Medicine,  
University of Surrey, Guildford, United Kingdom*

<sup>b</sup> *Institut für Anorganische Chemie, Julius-Maximilians-Universität Würzburg, Am Hubland,  
D-97074 Würzburg, Germany*

<sup>c</sup> *Department of Molecular Biology and Biotechnology, The University of Sheffield, United  
Kingdom*

\* Corresponding author: email: [ulrich.schatzschneider@uni-wuerzburg.de](mailto:ulrich.schatzschneider@uni-wuerzburg.de);

Tel: +49 931 31 83636; Fax: +49 931 31 84605

**Supporting Information**

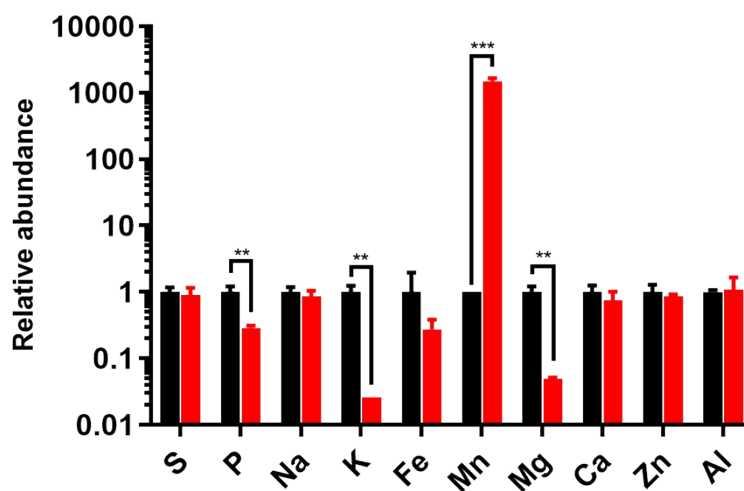

**Figure S1.** ICP-MS determination of the intracellular metal content of *E. coli* treated with  $[\text{Mn}(\text{CO})_3(\text{bqpa-}\kappa^3\text{N})]\text{Br}$  (red bars) relative to the metal content of control samples treated with 1% DMSO (black bars). Data shown are mean of three biological replicates and errors bars represent the standard deviation. \*, \*\*, and \*\*\* denote  $p$ -values of 0.01–0.05, 0.001–0.01, and  $< 0.001$  respectively, by Student's  $t$ -test.

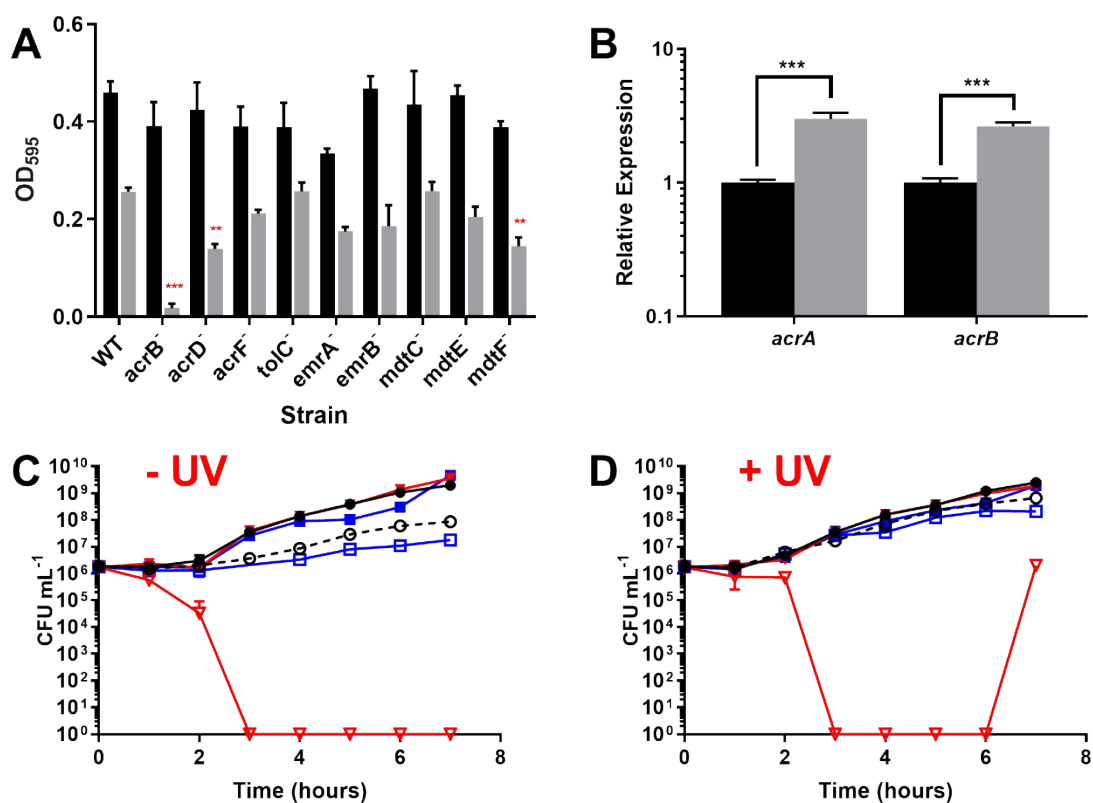

**Figure S2.** A) 5 h growth of *E. coli* strains in the absence (black bars) and presence (grey bars) of [Mn(CO)<sub>3</sub>(bqpa-κ<sup>3</sup>N)]Br. Values are means of three biological repeats with error bars indicating standard deviation. B) RT-PCR showing the relative expression of the *E. coli* genes *acrA* and *acrB* in cells grown in the absence (black bars) and presence (grey bars) of [Mn(CO)<sub>3</sub>(bqpa-κ<sup>3</sup>N)]Br. Expression levels are reported relative to the levels determined for untreated cells and normalized to the *rrsA* housekeeping gene. Data are plotted as means of results from three biological replicates (each consisting of three technical replicates) with standard deviations shown as error bars. C) Growth of *E. coli* without and D) with UV activation of [Mn(CO)<sub>3</sub>(bqpa-κ<sup>3</sup>N)]Br. Black lines represent wildtype (BW25113), red lines represent *acrB*<sup>-</sup> and blue line represent *acrD*<sup>-</sup>; solid points indicate the 1% DMSO control and unfilled points indicate cells treated with 105 μM [Mn(CO)<sub>3</sub>(bqpa-κ<sup>3</sup>N)]Br. \*, \*\*, and \*\*\* denote *p*-values of 0.01–0.05, 0.001–0.01, and < 0.001 respectively, by Student's *t*-test.

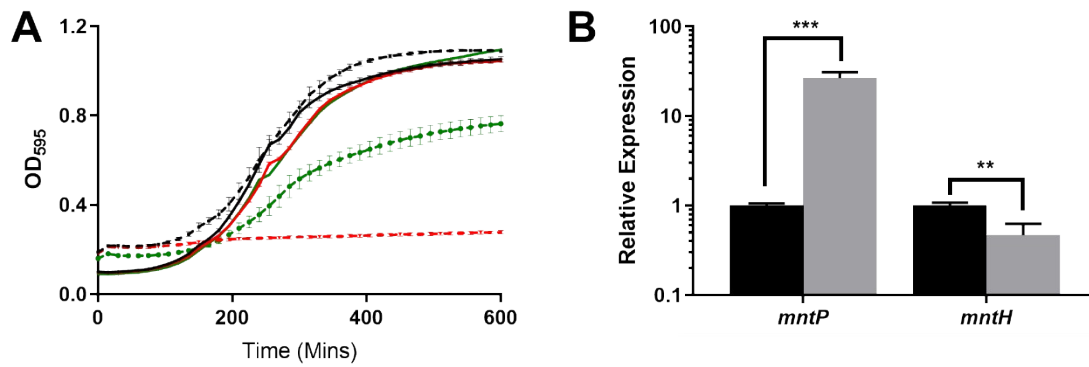

**Figure S3.** A) Growth curves of *E. coli* strains with (solid line) and without (dashed line) addition of [Mn(bqpa-κ<sup>3</sup>N)(CO)<sub>3</sub>]Br (105 μM); WT (BW25113) is represented by the black lines, *mntP*<sup>-</sup> is represented by the red lines and *mntR*<sup>-</sup> is represented by the green lines and B) RT-PCR of *mntP* and *mntH* indicates activation of the Mn regulator MntR, as shown by the increased in expression of *mntP* and the decrease in expression of *mntH* in response to treatment with [Mn (bqpa-κ<sup>3</sup>N)(CO)<sub>3</sub>]Br (grey) compared to the 1% DMSO control (black).

## Ligand synthesis

### Synthesis of *N*-(2-(bis(pyridin-2-ylmethyl)amino)ethyl)acetamide (**bpen**<sup>COCH<sub>3</sub></sup>)<sup>1</sup> **3**

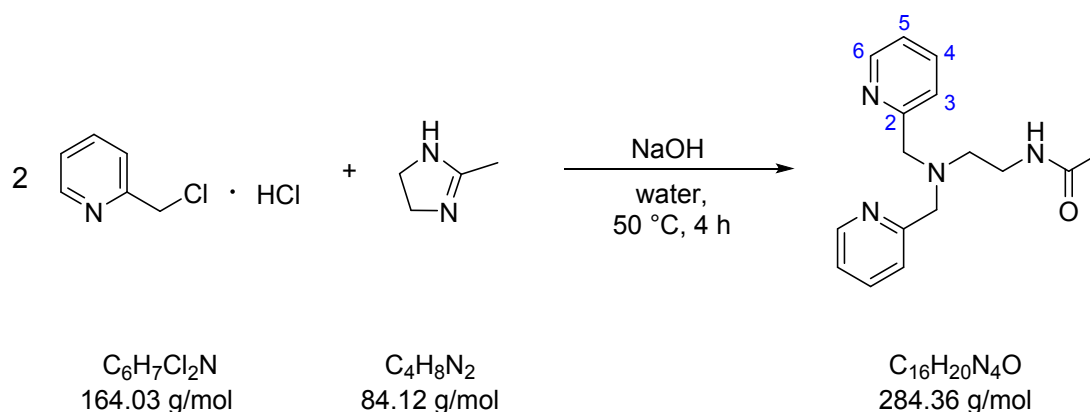

2-Methyl-4,5-dihydro-1*H*-imidazole (5.14 g, 61.1 mmol) was dissolved in water (5 mL) and heated to 75 °C for 2 h. The resulting yellow solution was cooled to room temperature and added to a solution of 2-(chloromethyl)pyridine hydrochloride (20.05 g, 122.2 mmol) in water (50 mL). The mixture was heated to 50 °C and then, with vigorous stirring, 10 M aqueous sodium hydroxide (24.5 mL, 245 mmol) was slowly added over 2 h, resulting in a colour change from light brown to violet-red. After complete addition, heating was continued for another 2 h and the reaction mixture then cooled to room temperature. The solution was extracted with dichloromethane (4 x 50 mL), the combined organic phases dried over sodium sulphate, the solvent removed under vacuum. The resulting dark red oil was dissolved in ethyl acetate (15 mL) and applied to a glass frit filled with neutral aluminium oxide. The yellow-orange product was eluted with ethyl acetate (approx. 300 mL) and the solvent removed under vacuum to obtain the product as a beige solid. Yield: 50% (8.70 g, 30.6 mmol). **IR** (ATR):  $\tilde{\nu} = 3244$  (m), 3056 (m), 2821 (w), 1666 (s), 1566 (m), 1430 (m), 1370 (w), 1284 (w), 758 (s)  $\text{cm}^{-1}$ ; **<sup>1</sup>H NMR** (300.18 MHz, CD<sub>2</sub>Cl<sub>2</sub>):  $\delta = 8.53$  (ddd, 2H, <sup>3</sup>*J*<sub>H<sub>6</sub>H<sub>5</sub></sub> = 4.9 Hz, <sup>4</sup>*J*<sub>H<sub>6</sub>H<sub>4</sub></sub> = 1.8 Hz, <sup>5</sup>*J*<sub>H<sub>6</sub>H<sub>3</sub></sub> = 0.9 Hz, py-H6), 7.63 (dt, 2H, <sup>3</sup>*J*<sub>H<sub>4</sub>H<sub>5</sub>/H<sub>3</sub></sub> = 7.7 Hz, <sup>4</sup>*J*<sub>H<sub>4</sub>H<sub>6</sub></sub> = 1.8 Hz, py-H4), 7.49 (s, 1H, NH), 7.36 (d, 2H, <sup>3</sup>*J*<sub>H<sub>3</sub>H<sub>4</sub></sub> = 7.7 Hz, py-H3), 7.16 (ddd, 2H, <sup>3</sup>*J*<sub>H<sub>5</sub>H<sub>4</sub></sub> = 7.5 Hz, <sup>3</sup>*J*<sub>H<sub>5</sub>H<sub>6</sub></sub> = 4.9 Hz, <sup>4</sup>*J*<sub>H<sub>5</sub>H<sub>3</sub></sub> = 1.2 Hz, py-H5), 3.85 (s, 4H, py-CH<sub>2</sub>), 3.27 (q, 2H, <sup>3</sup>*J* = 5.4 Hz, CH<sub>2</sub>NHAc), 2.71 (t, 2H, <sup>3</sup>*J* = 5.7 Hz, (Py-CH<sub>2</sub>)<sub>2</sub>NCH<sub>2</sub>), 1.95 (s, 3H, CH<sub>3</sub>) ppm; **<sup>13</sup>C NMR** (75.48 MHz, CD<sub>2</sub>Cl<sub>2</sub>):  $\delta = 169.89$  (C=O) 159.88 (py-C2), 149.42 (py-C6), 136.71 (py-C4), 123.45 (py-C3), 122.41 (py-C5), 60.26 (py-CH<sub>2</sub>), 53.05 ((py-CH<sub>2</sub>)<sub>2</sub>NCH<sub>2</sub>), 37.94 (CH<sub>2</sub>NHAc), 23.34 (CH<sub>3</sub>) ppm; **MS** (ESI<sup>+</sup>, CH<sub>3</sub>OH): *m/z* = 285.1694 [M+H]<sup>+</sup>, 307.1513 [M+Na]<sup>+</sup>; **Elemental analysis** (%) calcd. for C<sub>16</sub>H<sub>20</sub>N<sub>4</sub>O: C 67.58, H 7.09, N 19.70; found (%): C 67.32, H 7.07, N 19.70.

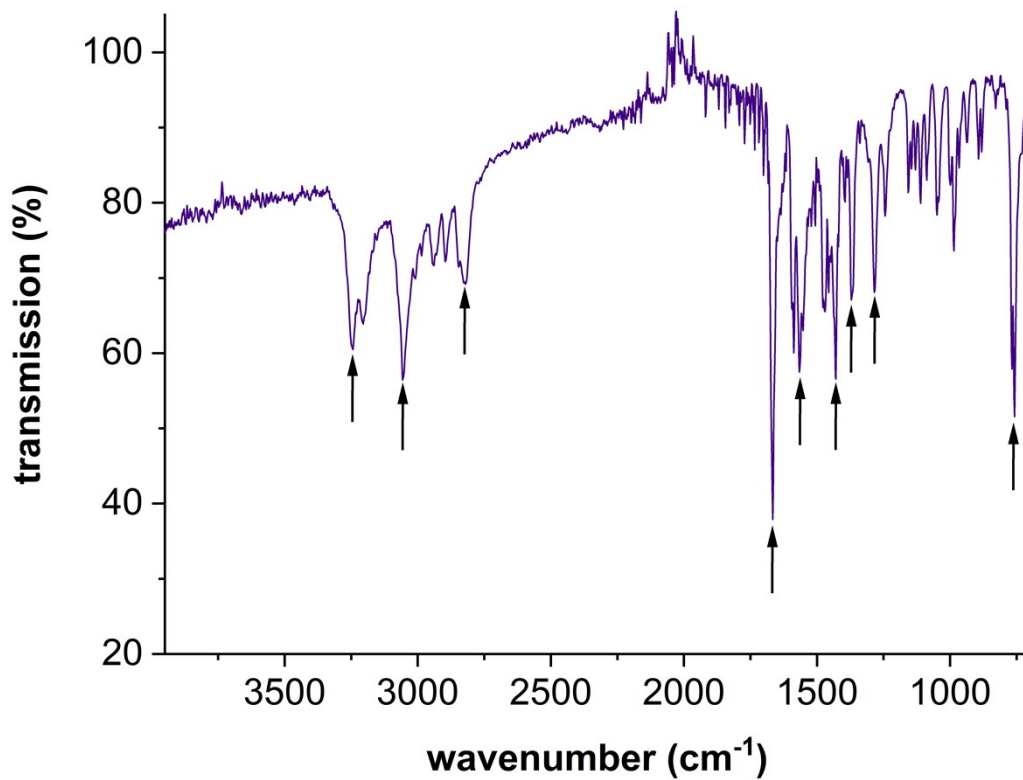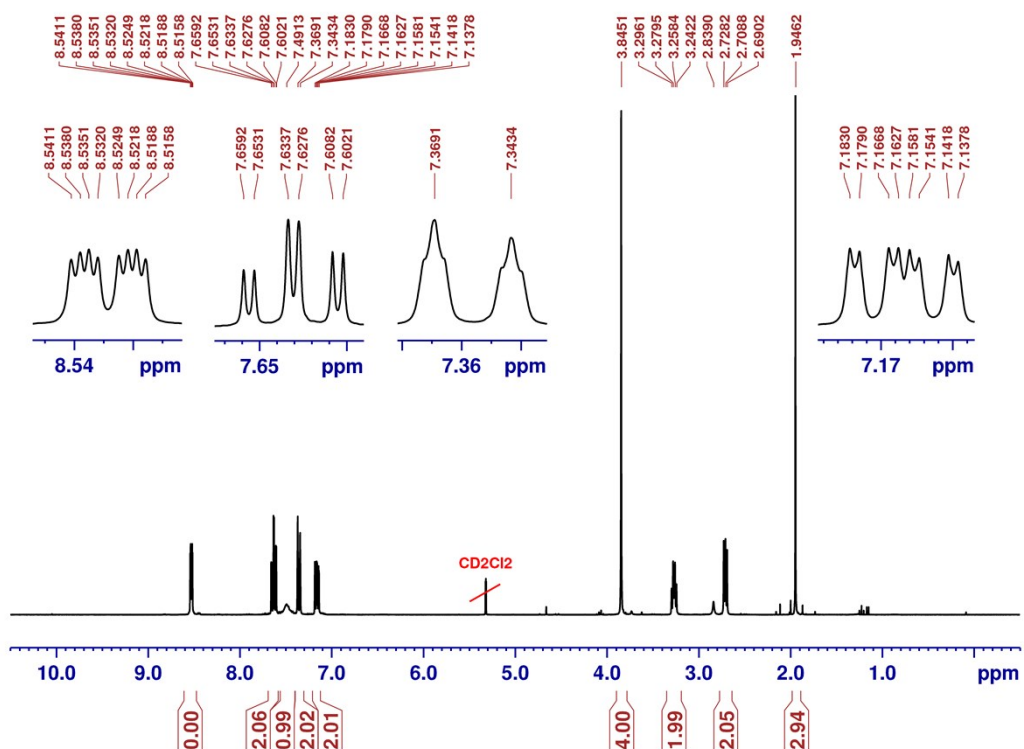

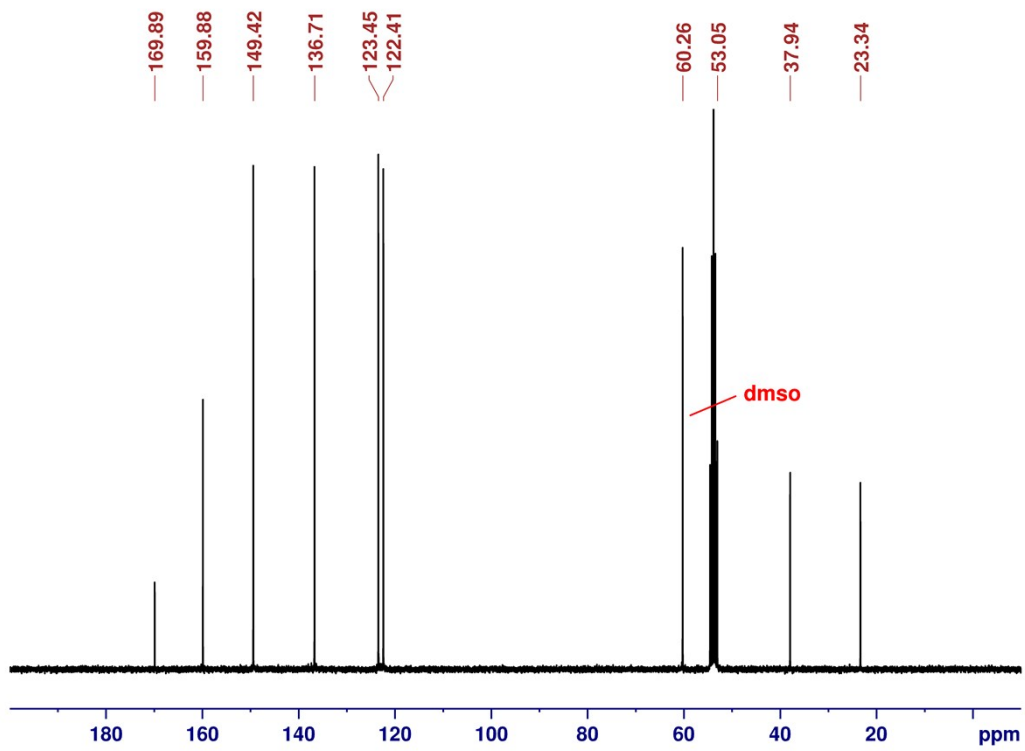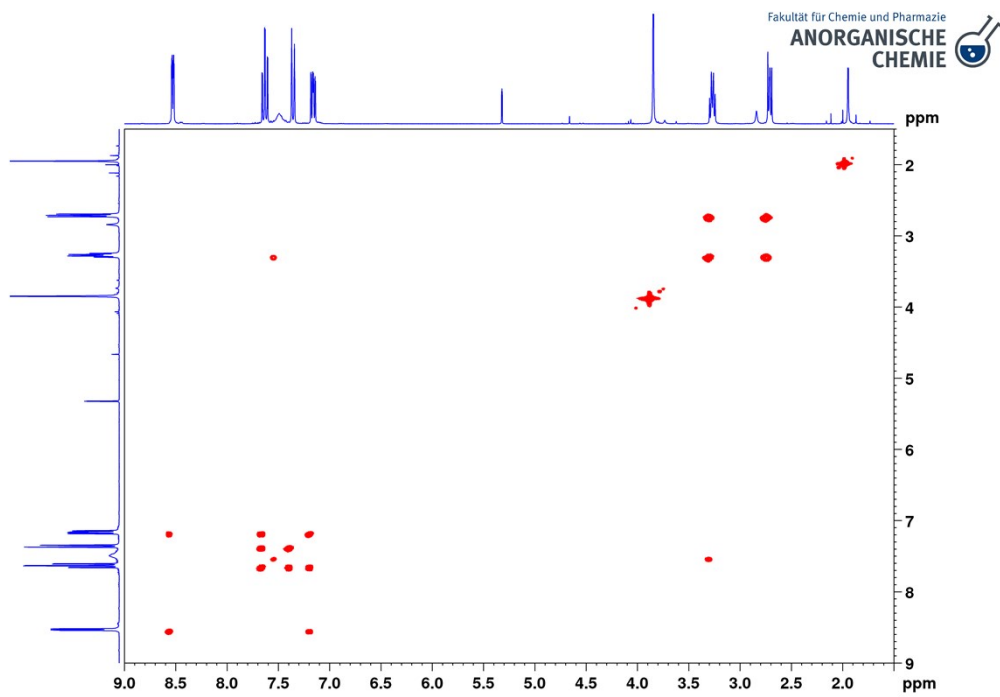

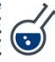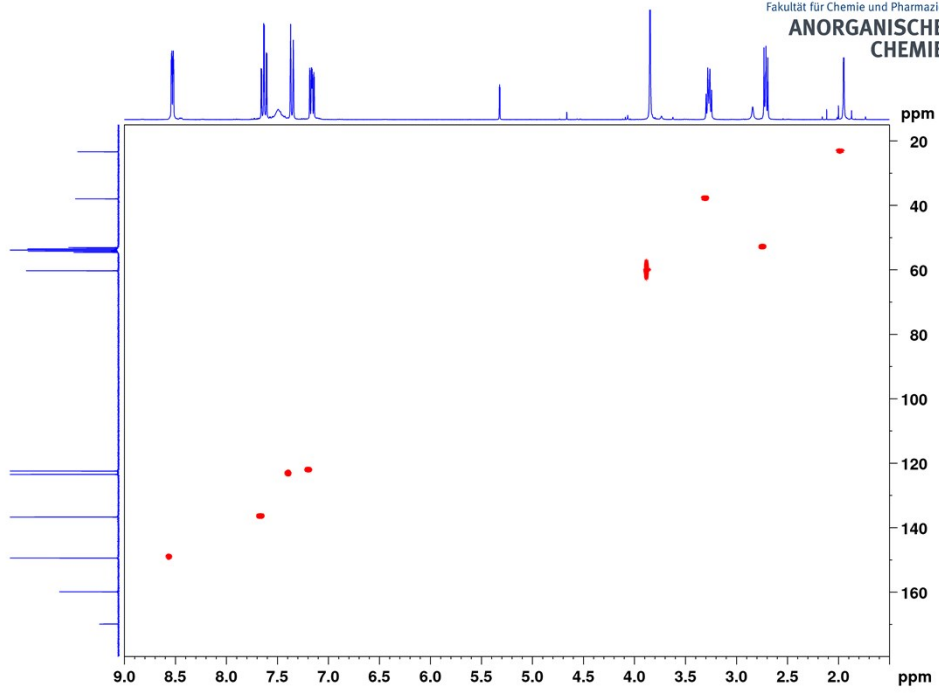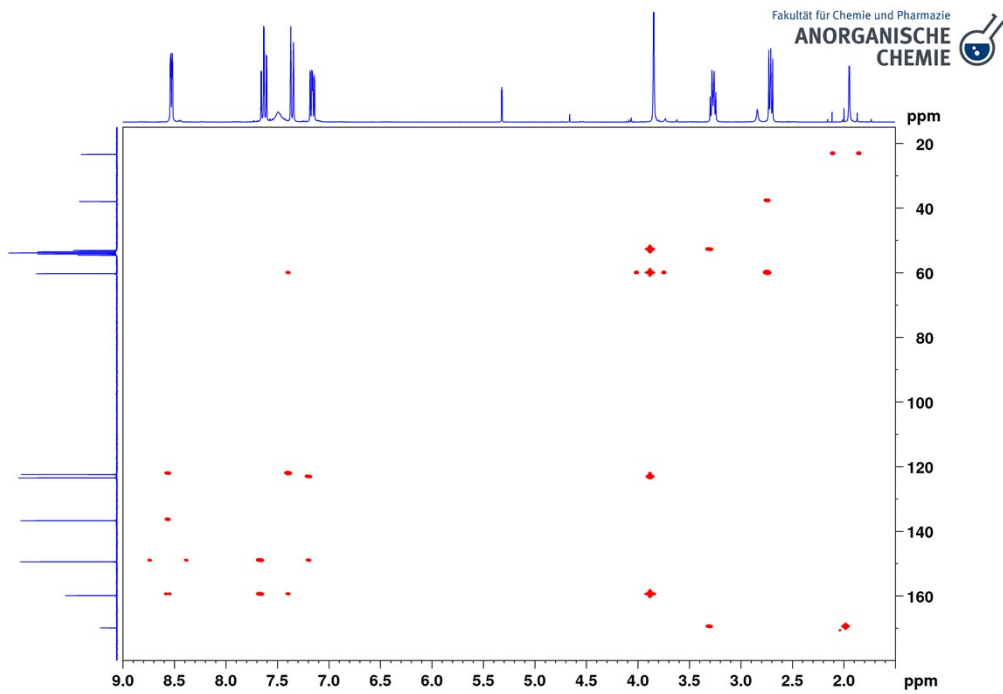



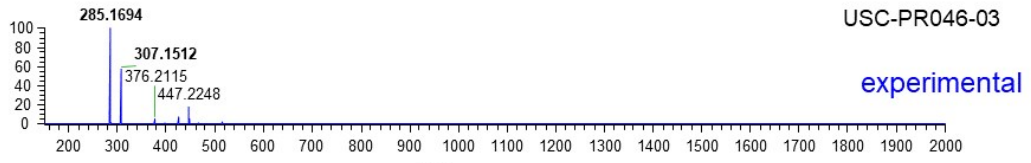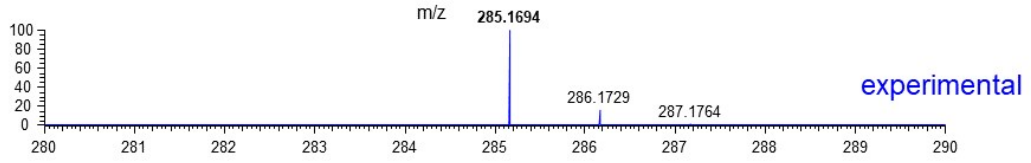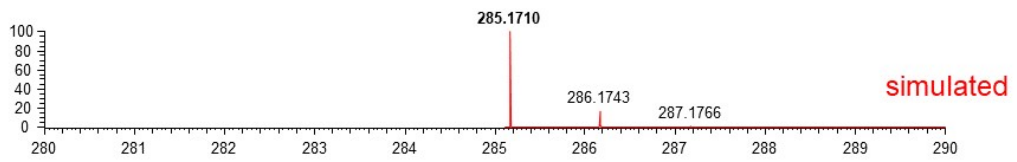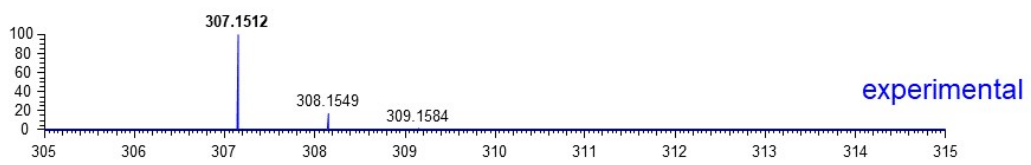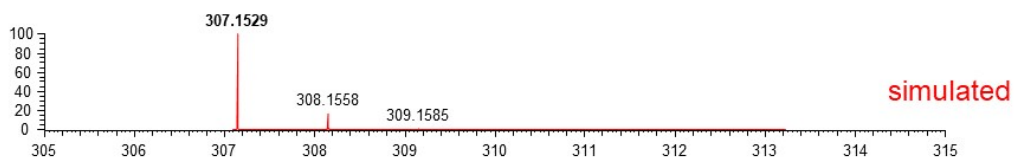

### Synthesis of *N,N*-bis(pyridin-2-ylmethyl)ethan-1,2-diamine (bpen)<sup>1</sup> 4

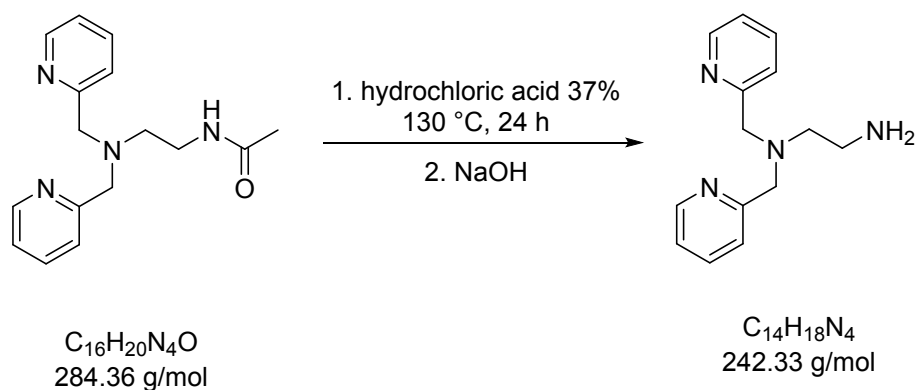

*N*-(2-(Bis(pyridin-2-ylmethyl)amino)ethyl)acetamide (4.73 g, 16.6 mmol) was dissolved in concentrated hydrochloric acid (50 mL) and then heated to 130 °C for 24 h. The resulting pale-yellow solution was carefully diluted with water (150 mL) and then solid sodium hydroxide was added to adjust to pH 10. The aqueous solution was extracted with dichloromethane (3 x 50 mL) and the combined organic phases were dried over sodium sulphate. After removal of the solvent under vacuum, the product was obtained as a pale-yellow oil. Since the compound is prone to decomposition, it was directly used in the next step with only limited characterization. Yield: 96% (3.89 g, 16.0 mmol). <sup>1</sup>H NMR (500.13 MHz, DMSO-*d*<sub>6</sub>):  $\delta$  = 8.48 (ddd, 2H, <sup>3</sup>*J*<sub>H<sub>6</sub>,H<sub>5</sub></sub> = 4.9 Hz, <sup>4</sup>*J*<sub>H<sub>6</sub>,H<sub>4</sub></sub> = 1.8 Hz, <sup>5</sup>*J*<sub>H<sub>6</sub>,H<sub>3</sub></sub> = 0.9 Hz, py-H6), 7.75 (dt, 2H, <sup>3</sup>*J*<sub>H<sub>4</sub>,H<sub>5</sub>/H<sub>3</sub></sub> = 7.7 Hz, <sup>4</sup>*J*<sub>H<sub>4</sub>,H<sub>6</sub></sub> = 1.9 Hz, py-H4), 7.54 (td, 2H, <sup>3</sup>*J*<sub>H<sub>3</sub>,H<sub>4</sub></sub> = 7.7 Hz, <sup>4</sup>*J*<sub>H<sub>3</sub>,H<sub>5</sub></sub> = 1.0 Hz, <sup>5</sup>*J*<sub>H<sub>3</sub>,H<sub>6</sub></sub> = 1.0 Hz, py-H3), 7.24 (ddd, 2H, <sup>3</sup>*J*<sub>H<sub>5</sub>,H<sub>4</sub></sub> = 7.5 Hz, <sup>3</sup>*J*<sub>H<sub>5</sub>,H<sub>6</sub></sub> = 4.9 Hz, <sup>4</sup>*J*<sub>H<sub>5</sub>,H<sub>3</sub></sub> = 1.2 Hz, py-H5), 3.75 (s, 4H, py-CH<sub>2</sub>), 2.63 (t, 2H, <sup>3</sup>*J* = 6.5 Hz, CH<sub>2</sub>NH<sub>2</sub>), 2.50 (t, 2H, <sup>3</sup>*J* = 6.5 Hz, (py-CH<sub>2</sub>)<sub>2</sub>NCH<sub>2</sub>, overlapping with solvent peak) ppm; <sup>13</sup>C NMR (125.76 MHz, DMSO-*d*<sub>6</sub>):  $\delta$  = 159.52 (py-C2), 148.70 (py-C6), 136.43 (py-C4), 122.59 (py-C3), 122.01 (py-C5), 60.04 (py-CH<sub>2</sub>), 57.23 ((py-CH<sub>2</sub>)<sub>2</sub>NCH<sub>2</sub>), 39.40 (CH<sub>2</sub>NH<sub>2</sub>, overlapping with solvent peak) ppm.

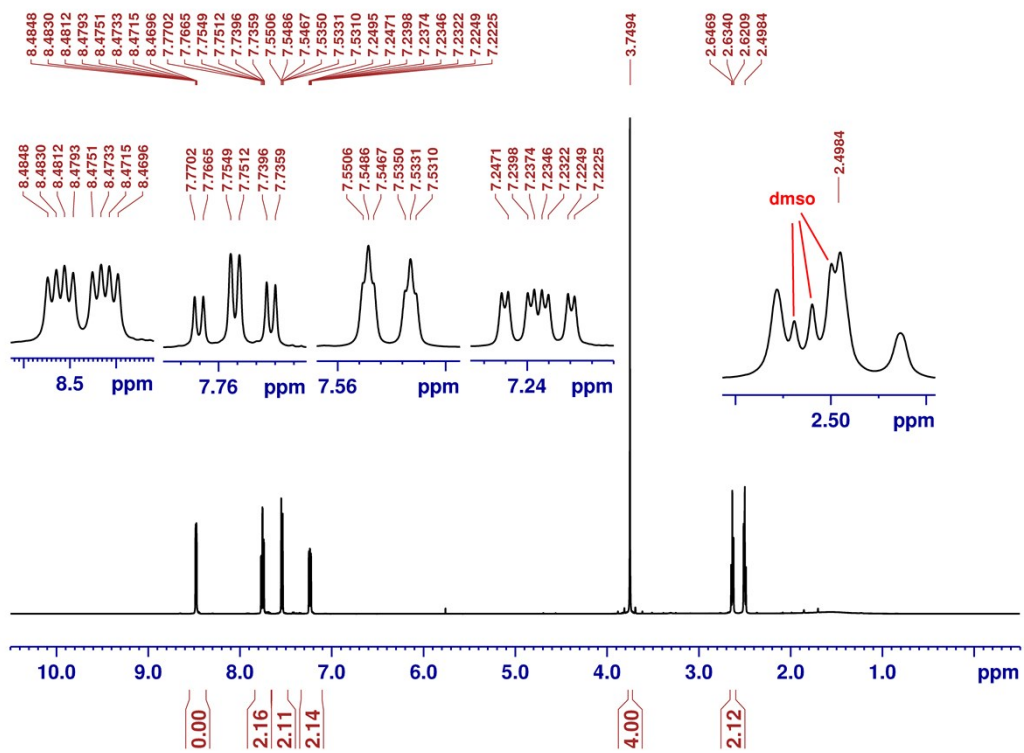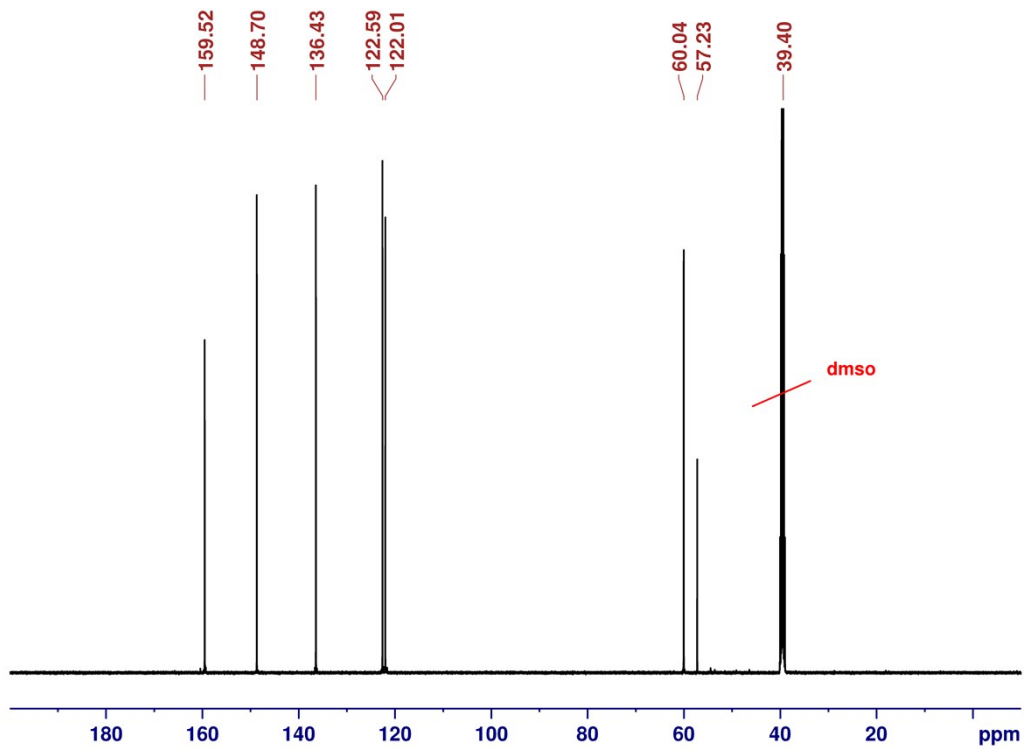

# Spectroscopic data for *N*-(2-(bis(pyridin-2-ylmethyl)amino)ethyl)cholamide

(bpen<sup>cholamid</sup>) **6**

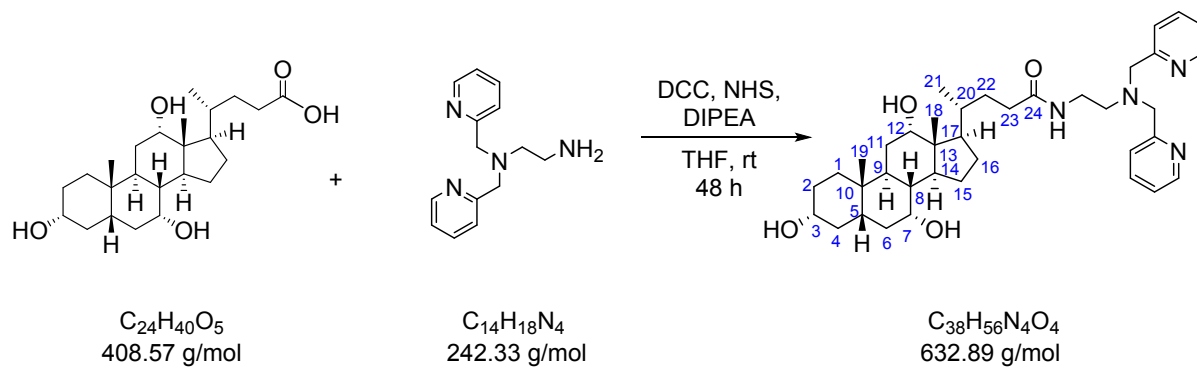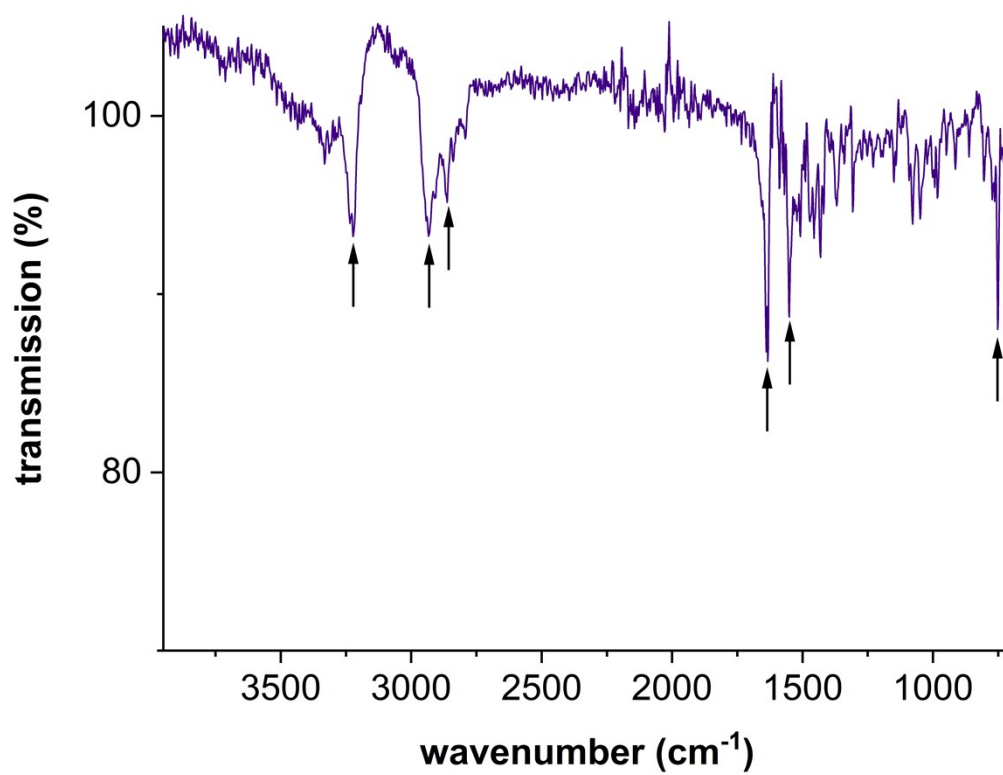

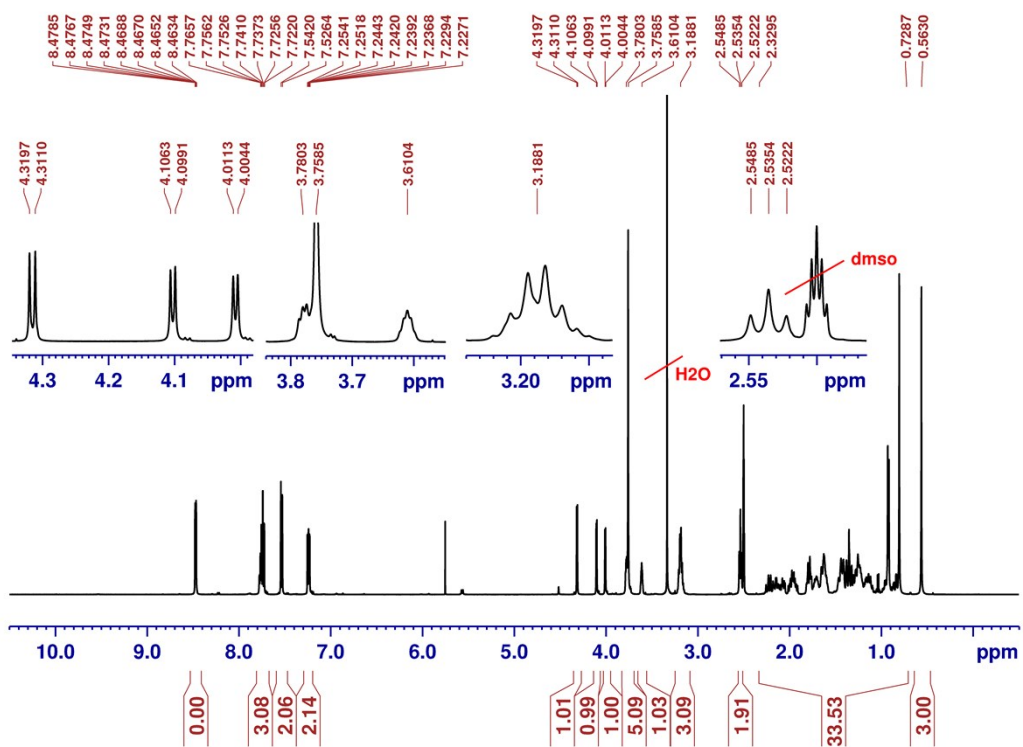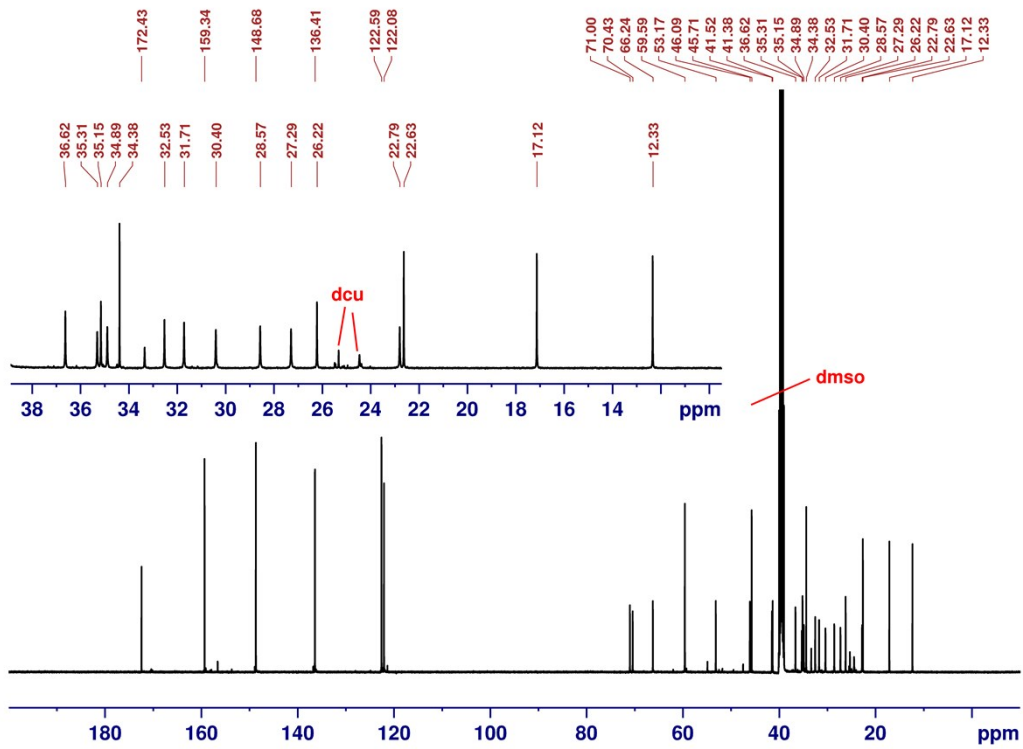

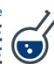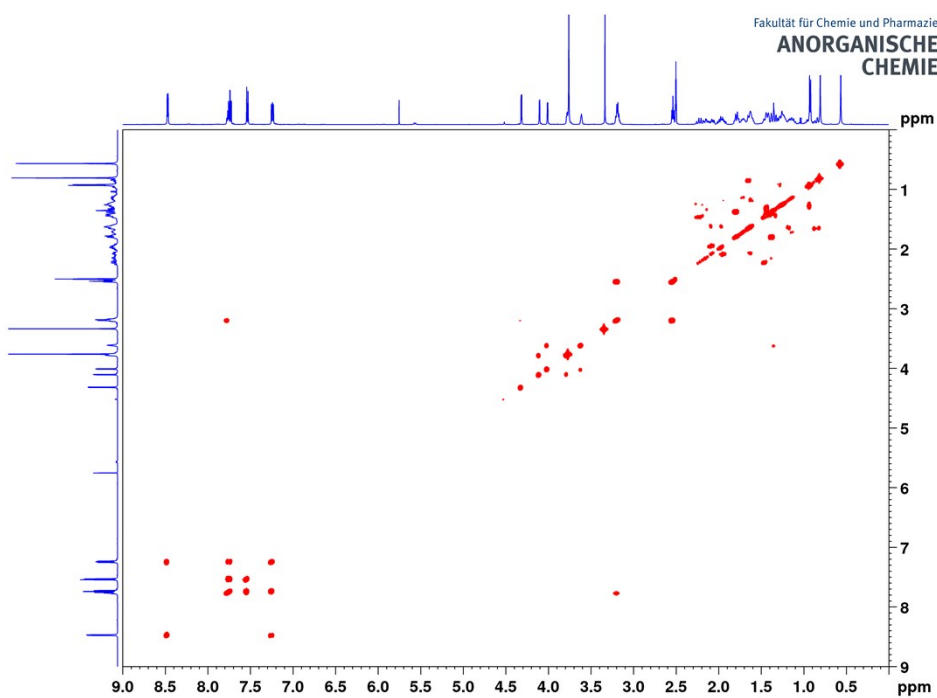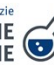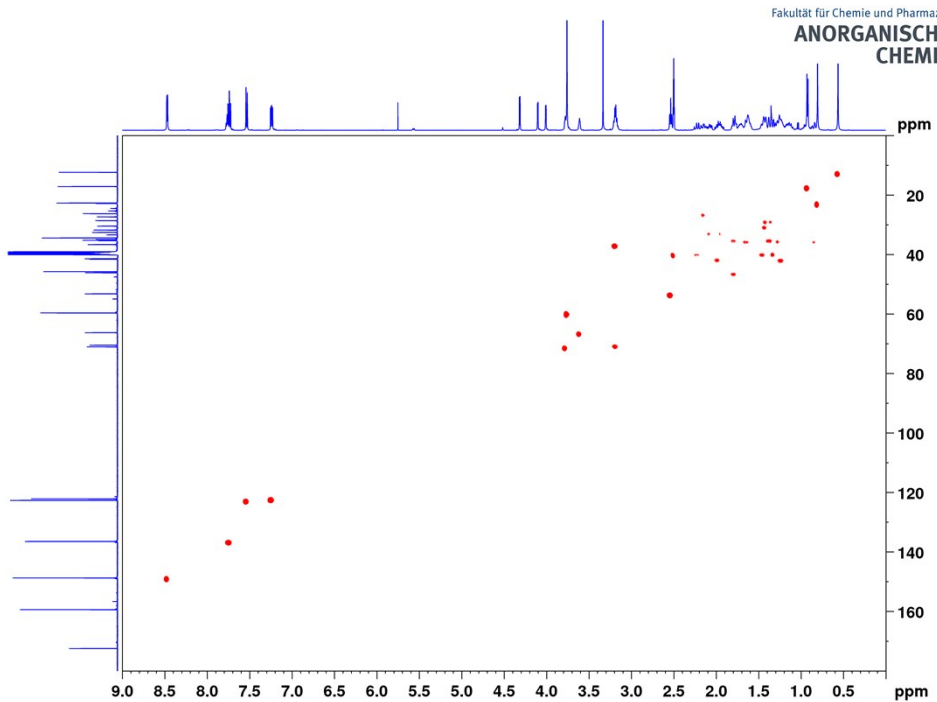

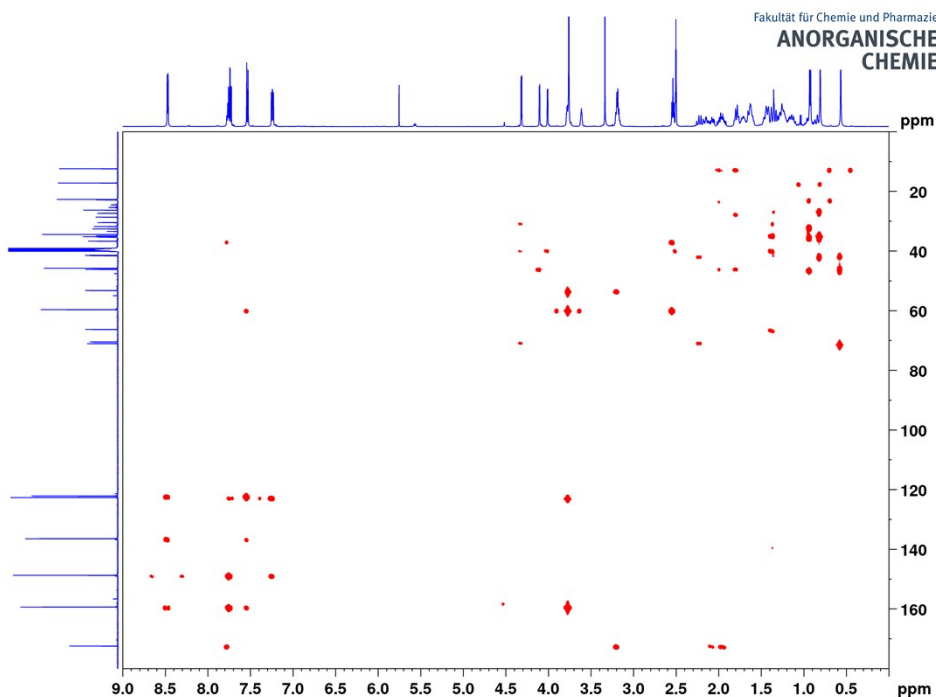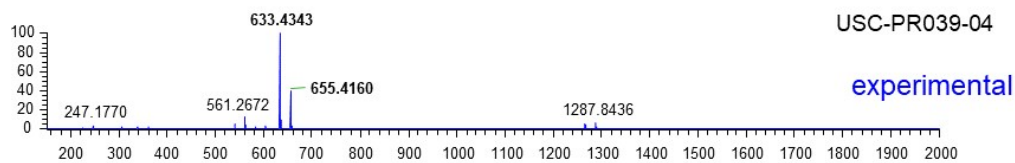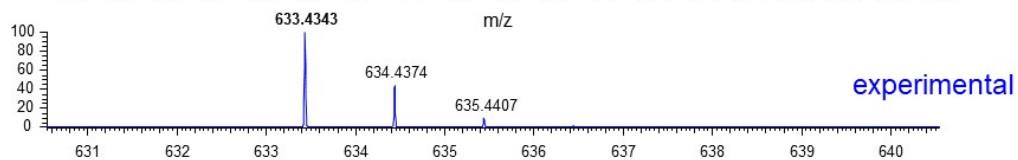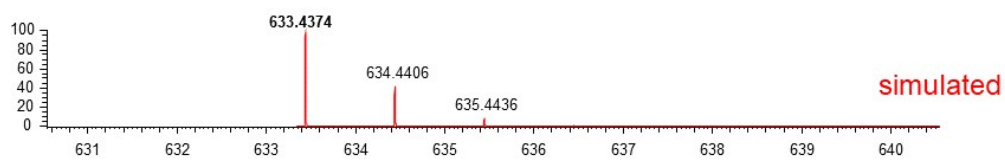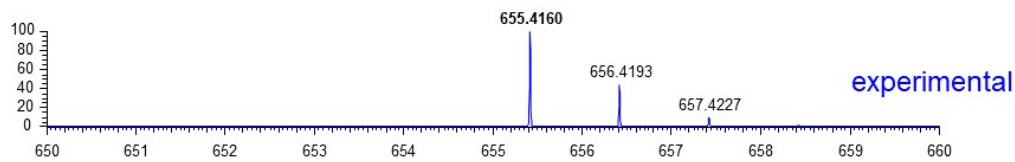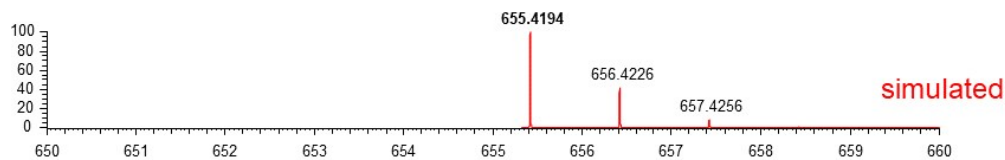

Spectroscopic data for  $[\text{Mn}(\text{bpen}^{\text{cholamid}}-\kappa^3\text{N})(\text{CO})_3]\text{Br}$  9

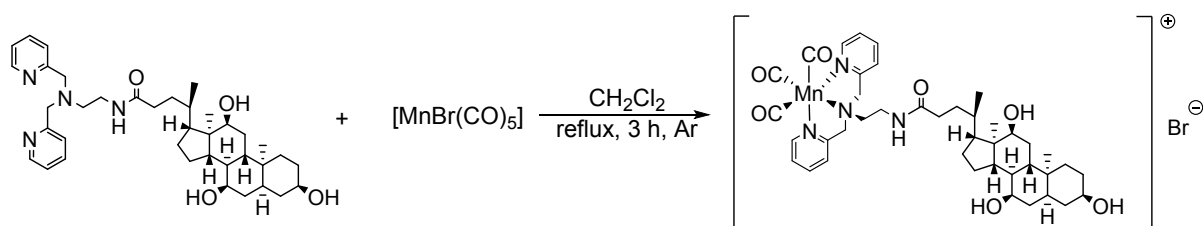

$\text{C}_{38}\text{H}_{56}\text{N}_4\text{O}_4$   
632.89 g/mol

274.89 g/mol

$\text{C}_{41}\text{H}_{56}\text{BrMnN}_4\text{O}_7$   
851.76 g/mol

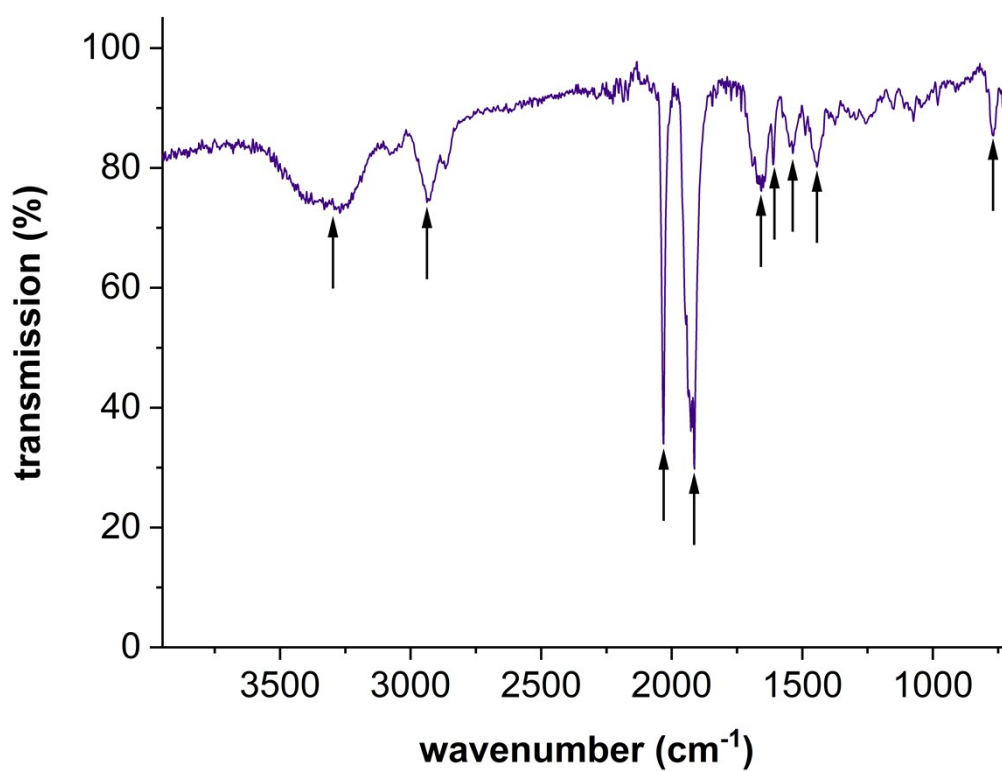



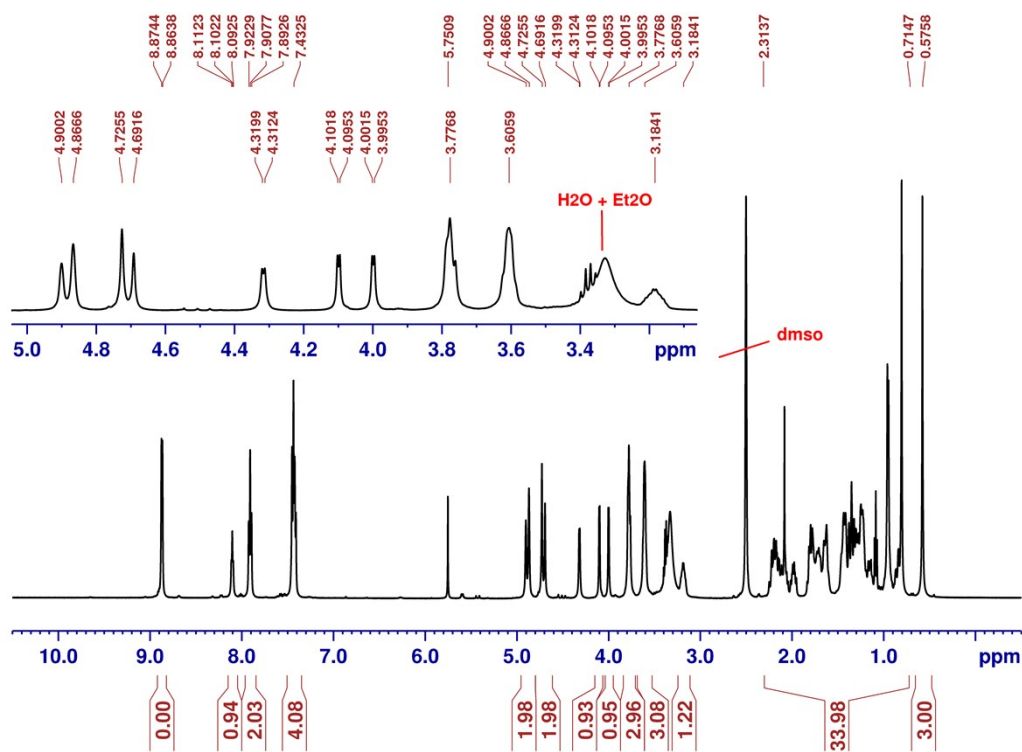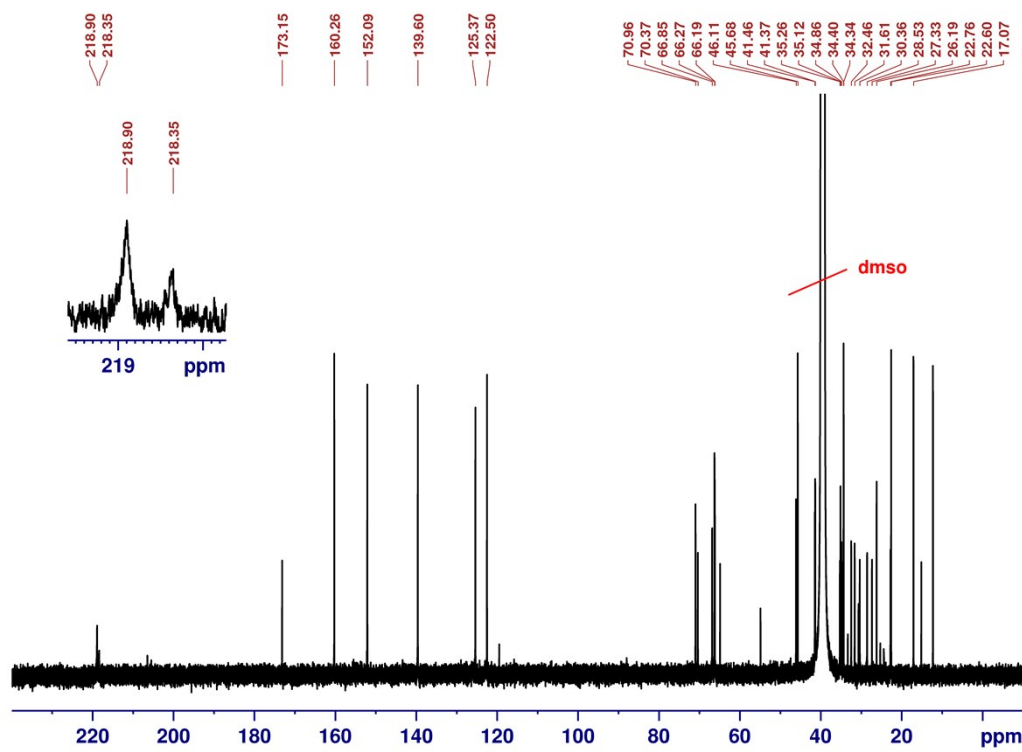

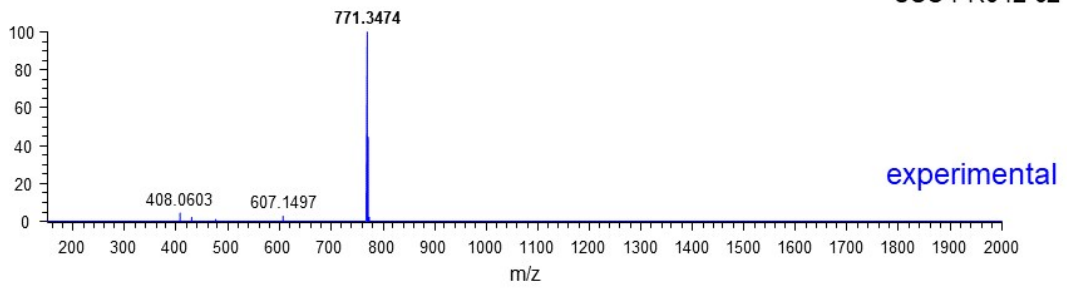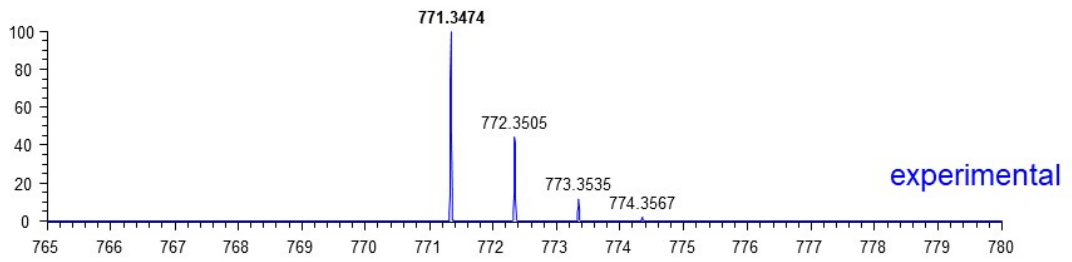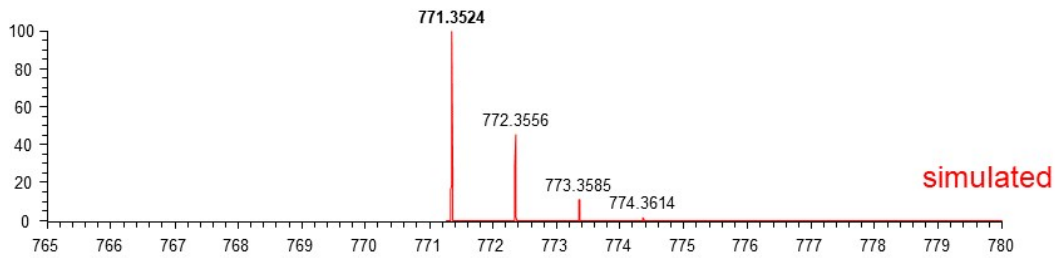

Spectroscopic data for  $[\text{Re}(\text{bpen}^{\text{cholamid}}-\kappa^3\text{N})(\text{CO})_3]\text{Br}$  10

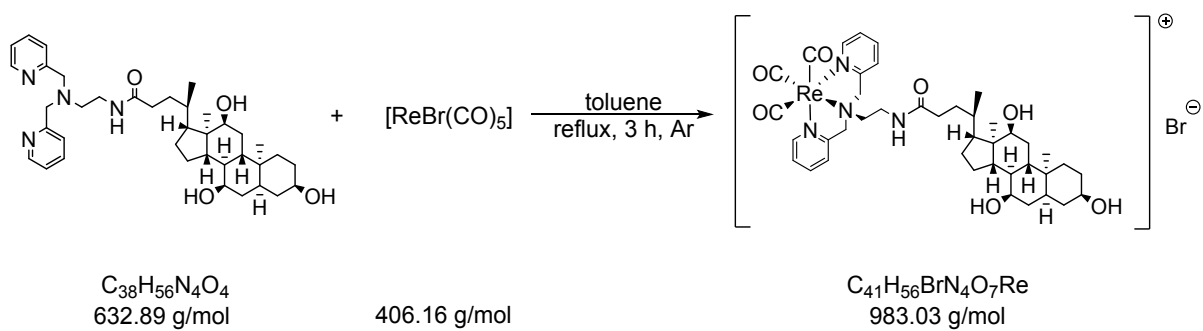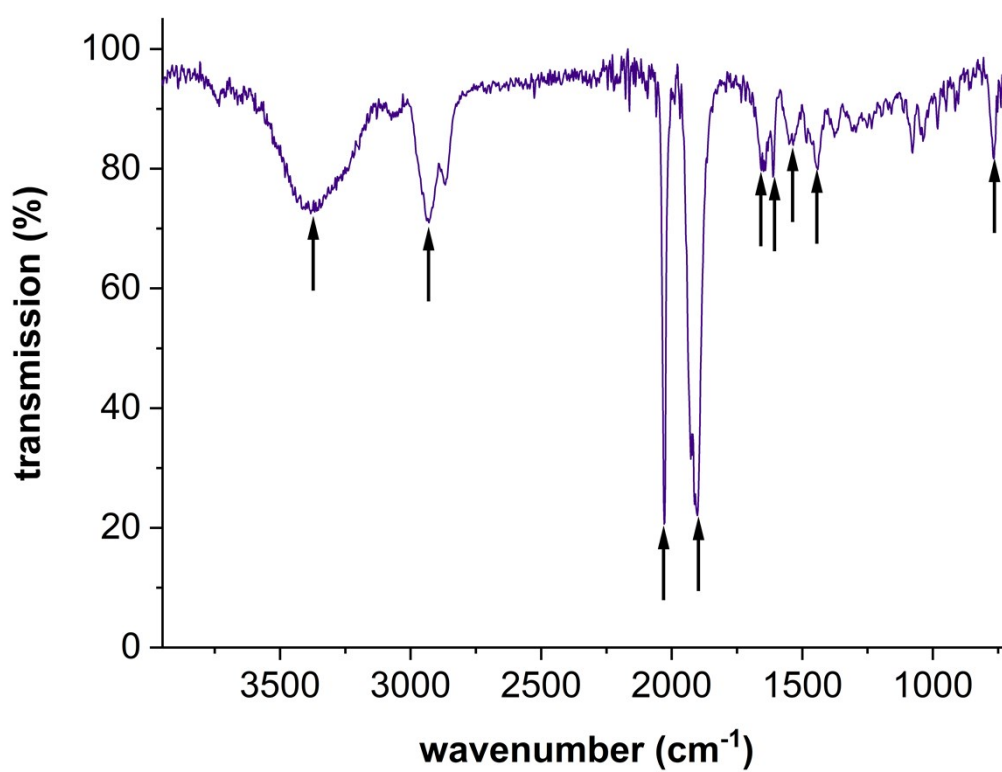

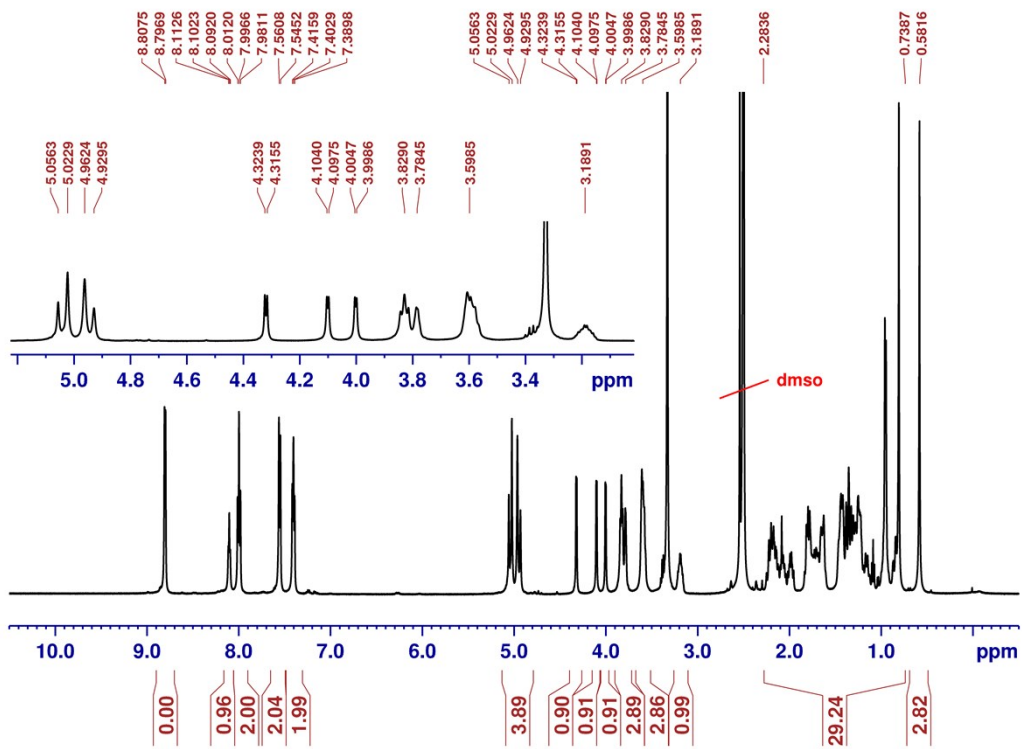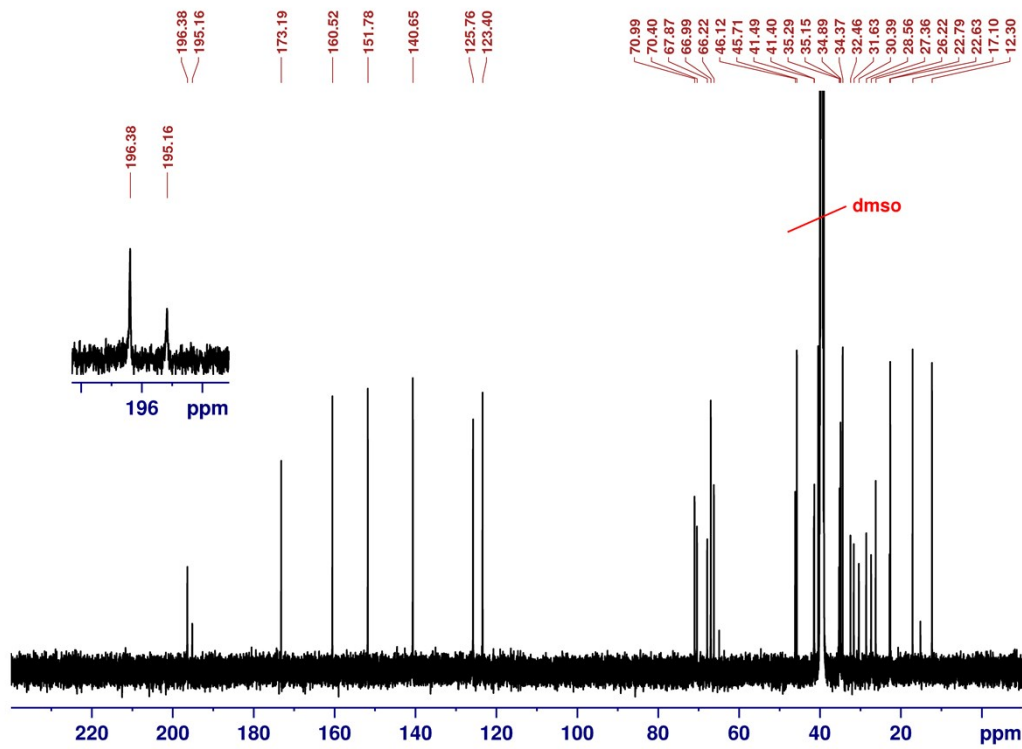

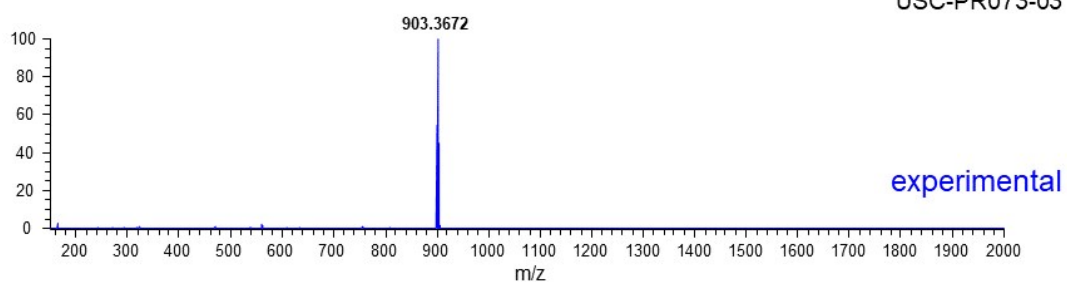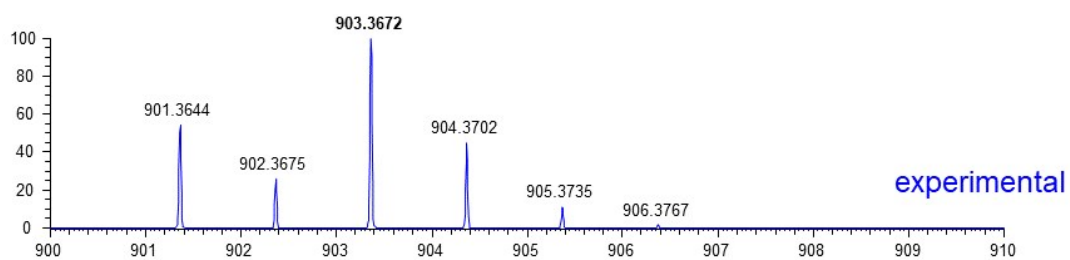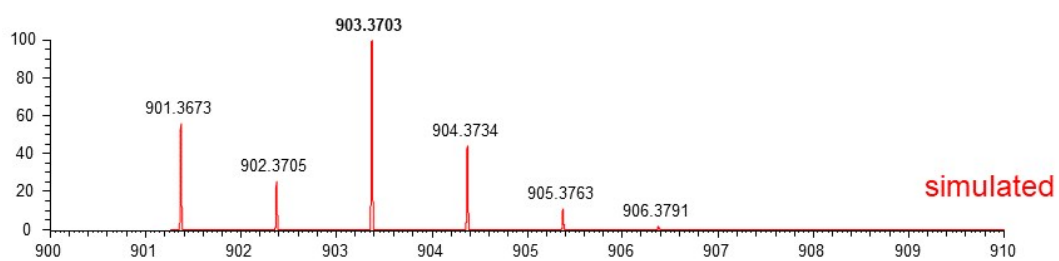

## References

- 1 Y.-H. Chiu and J. W. Canary, *Inorg. Chem.*, 2003, **42**, 5107.
